# Supplementary material
Source: PubMed Central journal article supplement (PMC5203665)
Supplement: IAI.00450-16_zii999091917s1.pdf [file IAI.00450-16_zii999091917s1.pdf]

| E value  | Estimated Precision | Fold/PDB Descriptor                     | Superfamily                        | Family                                                                                |
|----------|---------------------|-----------------------------------------|------------------------------------|---------------------------------------------------------------------------------------|
| 3.4e-10  | 100%                | PDB Header: hydrolase                   | PDB Molecule: lipase               | PDB Title: crystal structure of the extracellular lipase from Pseudomonas 2 sp. mis38 |
| 1.9e-09  | 100%                | PDB Header: hydrolase                   | PDB Molecule: extracellular lipase | PDB Title: crystal structure of extracellular lipase lipa from serratia 2 marcescens  |
| 1.6e-07  | 100%                | Single-stranded right-handed beta-helix | Pectin lyase-like                  | Virulence factor P.69 pertactin                                                       |
| 1.2e-06  | 100%                | PDB Header: hydrolase                   | PDB Molecule: serralysin           | PDB Title: Psychrophilic protease from pseudolateromonas 'tac ii 18'                  |
| 2e-06    | 100%                | PDB header: hydrolase                   | PDB Molecule: protease c           | PDB Title: the metzincins's methionine: prtc m226l mutant                             |
| 3.7e-0.6 | 95%                 | PDB Header: structural protein          | PDB Molecule: invasin              | PDB Title: crystal structure of invasin: a bacterial integrin binding protein         |

Supplemental Figure 1. Results from PHYRE1 analysis using the first 1200 amino acids of the ImaA protein sequence from *H. pylori* G27. Search run on January 25, 2012, using the original Phyre program as described in Kelley and Sternberg (**Kelley LA, Sternberg MJ.** 2009. Protein structure prediction on the Web: a case study using the Phyre server. *Nat Protoc* **4**:363-371).
